# Supplementary material for: Identifying the serious clinical outcomes of adverse reactions to drugs by a multi-task deep learning framework
Source: PubMed Central journal article supplement (PMC10449791; doi:10.1038/s42003-023-05243-w), 2023-08-24
Supplement: 42003_2023_5243_MOESM2_ESM.pdf [file 42003_2023_5243_MOESM2_ESM.pdf]

## Description of Additional Supplementary Files

**File name:** Supplementary Data 1

**Description:** The known drug-ADR interactions in the benchmark dataset.

**File name:** Supplementary Data 2

**Description:** The seriousness classes of serious drug-ADR interactions in the benchmark dataset.

**File name:** Supplementary Data 3

**Description:** An independent test dataset from SIDER database.

**File name:** Supplementary Data 4

**Description:** An independent test dataset from OFFSIDES database.

**File name:** Supplementary Data 5

**Description:** The SMILES sequences of the drugs in the benchmark dataset.

**File name:** Supplementary Data 6

**Description:** The semantic descriptors of ADRs in the benchmark dataset.
